# Supplementary material for: An RNA Virome Associated to the Golden Orb-Weaver Spider Nephila clavipes
Source: PubMed Central journal article supplement (PMC5660997; doi:10.3389/fmicb.2017.02097), 2017-10-25
Supplement: Table1.pdf [file Table1.pdf]

## *Supplementary Material*

### **Supplementary Tables**

#### **An RNA Virome associated to the Golden Orb-weaver Spider *Nephila clavipes***

**Humberto J. Debat**<sup>1\*</sup>

<sup>1</sup>Instituto de Patología Vegetal, Centro de Investigaciones Agropecuarias, Instituto Nacional de Tecnología Agropecuaria (IPAVE-CIAP-INTA), X5020ICA, Córdoba, Argentina

**\* Correspondence:**

Corresponding Author Humberto J. Debat [debat.humberto@inta.gob.ar](mailto:debat.humberto@inta.gob.ar)

| Annotation           | Type          | Start | End   | length | Database   | Id                | InterPro ID               | InterPro name                 |
|----------------------|---------------|-------|-------|--------|------------|-------------------|---------------------------|-------------------------------|
| unknown              | Gene3D        | 346   | 604   | 259    | GENE3D     | G3DSA:2.60.120.20 |                           | Unintegrated                  |
| Positive stranded ss | Superfamily   | 371   | 592   | 222    | SUPERFAM   | SSF88633          |                           | Unintegrated                  |
| unknown              | Gene3D        | 649   | 773   | 125    | GENE3D     | G3DSA:2.60.120.20 |                           | Unintegrated                  |
| Positive stranded ss | Superfamily   | 661   | 865   | 205    | SUPERFAM   | SSF88633          |                           | Unintegrated                  |
| Calici_coat          | Pfam          | 688   | 861   | 174    | PFAM       | PF00915           | <a href="#">IPR004005</a> | Calicivirus_coat              |
| unknown              | Gene3D        | 774   | 871   | 98     | GENE3D     | G3DSA:2.60.120.20 |                           | Unintegrated                  |
| unknown              | Gene3D        | 1,091 | 1,344 | 254    | GENE3D     | G3DSA:2.60.120.20 |                           | Unintegrated                  |
| Positive stranded ss | Superfamily   | 1,119 | 1,342 | 224    | SUPERFAM   | SSF88633          |                           | Unintegrated                  |
| CRPV_capsid          | Pfam          | 1,112 | 1,342 | 223    | PFAM       | PF08762           | <a href="#">IPR014872</a> | Dicistrovirus_capsid-polyPr_C |
| SF3_HELICASE_2       | PROSITE_PROFI | 1,722 | 1,886 | 165    | PROSITE_PI | PS51218           | <a href="#">IPR014759</a> | Helicase_SF3_ssRNA_vir        |
| unknown              | Gene3D        | 1,737 | 2,048 | 312    | GENE3D     | G3DSA:3.40.50.300 |                           | Unintegrated                  |
| RNA_helicase         | Pfam          | 1,743 | 1,849 | 107    | PFAM       | PF00910           | <a href="#">IPR000605</a> | Helicase_SF3_ssDNA/RNA_vir    |
| Trypsin-like serine  | Superfamily   | 2,356 | 2,553 | 198    | SUPERFAM   | SSF50494          | <a href="#">IPR009003</a> | Peptidase_S1_PA               |
| DNA/RNA polymer      | Superfamily   | 2,581 | 3,101 | 521    | SUPERFAM   | SSF56672          |                           | Unintegrated                  |
| RdRP_1               | Pfam          | 2,614 | 3,094 | 481    | PFAM       | PF00680           | <a href="#">IPR001205</a> | RNA-dir_pol_C                 |
| RDRP_SSRNA_PO        | PROSITE_PROFI | 2,839 | 2,971 | 133    | PROSITE_PI | PS50507           | <a href="#">IPR007094</a> | RNA-dir_pol_PVirus            |
| unknown              | Gene3D        | 2,876 | 3,016 | 141    | GENE3D     | G3DSA:3.30.70.270 |                           | Unintegrated                  |
| unknown              | Gene3D        | 3,017 | 3,107 | 91     | GENE3D     | G3DSA:1.20.960.20 |                           | Unintegrated                  |

**Supplementary Table 1.** Conserved domains and structural signatures of *Nephila clavipes* picorna-like virus 1 (NcPV1) predicted polyprotein assessed by the NCBI-CD database v3.15, THHM v. 2.0, PHOBIUS, SMART, Pfam 31.0, PROSITE Release 2017\_07 and Garnier GOR.

| Annotation           | Type          | Start | End   | length | Database  | Id                | InterPro ID               | InterPro name              |
|----------------------|---------------|-------|-------|--------|-----------|-------------------|---------------------------|----------------------------|
| unknown              | Gene3D        | 429   | 602   | 174    | GENE3D    | G3DSA:3.40.50.300 |                           | Unintegrated               |
| SF3_HELICASE_2       | PROSITE_PROFI | 443   | 614   | 172    | PROSITE_P | PS51218           | <a href="#">IPR014759</a> | Helicase_SF3_ssRNA_vir     |
| RNA_helicase         | Pfam          | 467   | 575   | 109    | PFAM      | PF00910           | <a href="#">IPR000605</a> | Helicase_SF3_ssDNA/RNA_vir |
| unknown              | Gene3D        | 901   | 978   | 78     | GENE3D    | G3DSA:3.40.50.300 |                           | Unintegrated               |
| P-loop containing n  | Superfamily   | 927   | 1,049 | 123    | SUPERFAM  | SSF52540          | <a href="#">IPR027417</a> | P-loop_NTPase              |
| AAA                  | Pfam          | 970   | 1,028 | 59     | PFAM      | PF00004           | <a href="#">IPR003959</a> | ATPase_AAA_core            |
| unknown              | Gene3D        | 979   | 1,185 | 207    | GENE3D    | G3DSA:3.40.50.300 |                           | Unintegrated               |
| Trypsin-like serine  | Superfamily   | 1,697 | 1,841 | 145    | SUPERFAM  | SSF50494          | <a href="#">IPR009003</a> | Peptidase_S1_PA            |
| unknown              | Gene3D        | 1,768 | 1,848 | 81     | GENE3D    | G3DSA:2.40.10.10  |                           | Unintegrated               |
| DNA/RNA polymer      | Superfamily   | 1,886 | 2,397 | 512    | SUPERFAM  | SSF56672          |                           | Unintegrated               |
| RdRP_1               | Pfam          | 1,901 | 2,4   | 500    | PFAM      | PF00680           | <a href="#">IPR001205</a> | RNA-dir_pol_C              |
| unknown              | Gene3D        | 2,169 | 2,305 | 137    | GENE3D    | G3DSA:3.30.70.270 |                           | Unintegrated               |
| unknown              | Gene3D        | 2,306 | 2,406 | 101    | GENE3D    | G3DSA:1.20.960.20 |                           | Unintegrated               |
|                      |               |       |       |        |           |                   |                           |                            |
| unknown              | Gene3D        | 10    | 232   | 223    | GENE3D    | G3DSA:2.60.120.20 |                           | Unintegrated               |
| Calici_coat          | Pfam          | 24    | 245   | 222    | PFAM      | PF00915           | <a href="#">IPR004005</a> | Calicivirus_coat           |
| Positive stranded ss | Superfamily   | 53    | 243   | 191    | SUPERFAM  | SSF88633          |                           | Unintegrated               |

**Supplementary Table 2.** Conserved domains and structural signatures of *Nephila clavipes* picorna-like virus 2 (NcPV2) predicted polyprotein and additional gene products assessed by the NCBI-CD database v3.15, THHM v. 2.0, PHOBIUS, SMART, Pfam 31.0, PROSITE Release 2017\_07 and Garnier GOR.

## Supplementary Material Debat

| Annotation           | Type          | Start | End   | length | Database  | Id                | InterPro ID               | InterPro name                 |
|----------------------|---------------|-------|-------|--------|-----------|-------------------|---------------------------|-------------------------------|
| Calici_coat          | Pfam          | 259   | 472   | 214    | PFAM      | PF00915           | <a href="#">IPR004005</a> | Calicivirus_coat              |
| unknown              | Gene3D        | 271   | 402   | 132    | GENE3D    | G3DSA:2.60.120.20 |                           | Unintegrated                  |
| Positive stranded ss | Superfamily   | 277   | 491   | 215    | SUPERFAM  | SSF88633          |                           | Unintegrated                  |
| Waikav_capsid_1      | Pfam          | 320   | 487   | 168    | PFAM      | PF12264           | IPR024379                 | Waikavirus_capsid-1           |
| unknown              | Gene3D        | 403   | 494   | 92     | GENE3D    | G3DSA:2.60.120.20 |                           | Unintegrated                  |
| Positive stranded ss | Superfamily   | 533   | 804   | 272    | SUPERFAM  | SSF88633          |                           | Unintegrated                  |
| unknown              | Gene3D        | 552   | 819   | 268    | GENE3D    | G3DSA:2.60.120.20 |                           | Unintegrated                  |
| Rhv                  | Pfam          | 661   | 736   | 76     | PFAM      | PF00073           | IPR001676                 | Picornavirus_capsid           |
| unknown              | Gene3D        | 822   | 1,062 | 241    | GENE3D    | G3DSA:2.60.120.20 |                           | Unintegrated                  |
| Positive stranded ss | Superfamily   | 843   | 1,058 | 216    | SUPERFAM  | SSF88633          |                           | Unintegrated                  |
| CRPV_capsid          | Pfam          | 855   | 1,058 | 204    | PFAM      | PF08762           | IPR014872                 | Dicistrovirus_capsid-polyPr_C |
| SF3_HELICASE_2       | PROSITE_PROFI | 1,448 | 1,61  | 163    | PROSITE_P | PS51218           | IPR014759                 | Helicase_SF3_ssRNA_vir        |
| RNA_helicase         | Pfam          | 1,47  | 1,571 | 102    | PFAM      | PF00910           | IPR000605                 | Helicase_SF3_ssDNA/RNA_vir    |
| Trypsin-like serine  | Superfamily   | 1,995 | 2,202 | 208    | SUPERFAM  | SSF50494          | IPR009003                 | Peptidase_S1_PA               |
| unknown              | Gene3D        | 2,088 | 2,206 | 119    | GENE3D    | G3DSA:2.40.10.10  |                           | Unintegrated                  |
| DNA/RNA polymer      | Superfamily   | 2,234 | 2,716 | 483    | SUPERFAM  | SSF56672          |                           | Unintegrated                  |
| RdRP_1               | Pfam          | 2,24  | 2,718 | 479    | PFAM      | PF00680           | IPR001205                 | RNA-dir_pol_C                 |
| RDRP_SSRNA_PO        | PROSITE_PROFI | 2,474 | 2,609 | 136    | PROSITE_P | PS50507           | IPR007094                 | RNA-dir_pol_PSVirus           |
| unknown              | Gene3D        | 2,512 | 2,644 | 133    | GENE3D    | G3DSA:3.30.70.270 |                           | Unintegrated                  |
| unknown              | Gene3D        | 2,645 | 2,743 | 99     | GENE3D    | G3DSA:1.20.960.20 |                           | Unintegrated                  |

**Supplementary Table 3.** Conserved domains and structural signatures of *Nephila clavipes* picorna-like virus 3 (NcPV3) predicted polyprotein assessed by the NCBI-CD database v3.15, THHM v. 2.0, PHOBIUS, SMART, Pfam 31.0, PROSITE Release 2017\_07 and Garnier GOR.

| Annotation            | Type          | Start | End   | length | Database  | Id                | InterPro ID               | InterPro name              |
|-----------------------|---------------|-------|-------|--------|-----------|-------------------|---------------------------|----------------------------|
| SF3_HELICASE_2        | PROSITE_PROFI | 791   | 958   | 168    | PROSITE_P | PS51218           | <a href="#">IPR014759</a> | Helicase_SF3_ssRNA_vir     |
| RNA_helicase          | Pfam          | 813   | 918   | 106    | PFAM      | PF00910           | IPR000605                 | Helicase_SF3_ssDNA/RNA_vir |
| unknown               | Gene3D        | 1,025 | 1,169 | 145    | GENE3D    | G3DSA:3.40.50.300 |                           | Unintegrated               |
| P-loop containing n   | Superfamily   | 1,064 | 1,151 | 88     | SUPERFAM  | SSF52540          | IPR027417                 | P-loop_NTPase              |
| Trypsin-like serine p | Superfamily   | 1,618 | 1,807 | 190    | SUPERFAM  | SSF50494          | IPR009003                 | Peptidase_S1_PA            |
| unknown               | Gene3D        | 1,706 | 1,823 | 118    | GENE3D    | G3DSA:2.40.10.10  |                           | Unintegrated               |
| DNA/RNA polymer       | Superfamily   | 1,867 | 2,351 | 485    | SUPERFAM  | SSF56672          |                           | Unintegrated               |
| RdRP_1                | Pfam          | 1,869 | 2,336 | 468    | PFAM      | PF00680           | IPR001205                 | RNA-dir_pol_C              |
| RDRP_SSRNA_PO         | PROSITE_PROFI | 2,094 | 2,229 | 136    | PROSITE_P | PS50507           | IPR007094                 | RNA-dir_pol_Psvirus        |
| unknown               | Gene3D        | 2,133 | 2,265 | 133    | GENE3D    | G3DSA:3.30.70.270 |                           | Unintegrated               |
| unknown               | Gene3D        | 2,266 | 2,37  | 105    | GENE3D    | G3DSA:1.20.960.20 |                           | Unintegrated               |
| unknown               | Gene3D        | 2,376 | 2,532 | 157    | GENE3D    | G3DSA:2.60.10.10  | IPR027450                 | AlkB-like                  |
| Clavamate syntha      | Superfamily   | 2,4   | 2,531 | 132    | SUPERFAM  | SSF51197          |                           | Unintegrated               |
| unknown               | Gene3D        | 2     | 231   | 230    | GENE3D    | G3DSA:2.60.120.20 |                           | Unintegrated               |
| Calici_coat           | Pfam          | 44    | 261   | 218    | PFAM      | PF00915           | IPR004005                 | Calicivirus_coat           |
| Positive stranded ss  | Superfamily   | 47    | 487   | 263    | SUPERFAM  | SSF88633          |                           | Unintegrated               |
| unknown               | Gene3D        | 396   | 507   | 112    | GENE3D    | G3DSA:2.40.510.10 |                           | Unintegrated               |

**Supplementary Table 4.** Conserved domains and structural signatures of *Nephila clavipes* picorna-like virus 4 (NcPV4) predicted polyprotein and additional gene products assessed by the NCBI-CD database v3.15, THHM v. 2.0, PHOBIUS, SMART, Pfam 31.0, PROSITE Release 2017\_07 and Garnier GOR.

## Supplementary Material Debat

| Annotation          | Type          | Start | End   | length | Database  | Id                | InterPro ID               | InterPro name                  |
|---------------------|---------------|-------|-------|--------|-----------|-------------------|---------------------------|--------------------------------|
| Vmethyltransf       | Pfam          | 131   | 521   | 391    | PFAM      | PF01660           | <a href="#">IPR002588</a> | Alphavirus-like_MT_dom         |
| ALPHAVIRUS_MT       | PROSITE_PROFI | 149   | 367   | 219    | PROSITE_P | PS51743           | <a href="#">IPR002588</a> | Alphavirus-like_MT_dom         |
| unknown             | Gene3D        | 311   | 1,555 | 1,245  | GENE3D    | G3DSA:3.40.50.300 |                           | Unintegrated                   |
| PSRV_HELICASE       | PROSITE_PROFI | 1,233 | 1,573 | 341    | PROSITE_P | PS51657           | <a href="#">IPR027351</a> | (+)RNA_virus_helicase_core_don |
| P-loop containing n | Superfamily   | 1,265 | 1,539 | 275    | SUPERFAM  | SSF52540          | <a href="#">IPR027417</a> | P-loop_NTPase                  |
| Viral_helicase1     | Pfam          | 1,267 | 1,541 | 275    | PFAM      | PF01443           | <a href="#">IPR027351</a> | (+)RNA_virus_helicase_core_don |
| RdRP_2              | Pfam          | 1,786 | 2,247 | 462    | PFAM      | PF00978           | <a href="#">IPR001788</a> | Tymovirus_RNA-dep_RNA_pol      |
| DNA/RNA polymer     | Superfamily   | 1,813 | 2,223 | 411    | SUPERFAM  | SSF56672          |                           | Unintegrated                   |
| RDRP_SSRNA_PO       | PROSITE_PROFI | 1,997 | 2,132 | 136    | PROSITE_P | PS50507           | <a href="#">IPR007094</a> | RNA-dir_pol_Psvirus            |
| unknown             | Gene3D        | 2,045 | 2,169 | 125    | GENE3D    | G3DSA:3.30.70.270 |                           | Unintegrated                   |
| SP24                | Pfam          | 50    | 172   | 123    | PFAM      | PF16504           | <a href="#">IPR032441</a> | SP24                           |
| unknown             | TMHMM         | 119   | 136   | 18     | TMHMM     | TMhelix           |                           | Unintegrated                   |
| unknown             | TMHMM         | 157   | 176   | 20     | TMHMM     | TMhelix           |                           | Unintegrated                   |

**Supplementary Table 5.** Conserved domains and structural signatures of *Nephila clavipes* virga-like virus 1 (NcVV1) predicted replicase protein and additional gene products assessed by the NCBI-CD database v3.15, THHM v. 2.0, PHOBIUS, SMART, Pfam 31.0, PROSITE Release 2017\_07 and Garnier GOR.

| Annotation          | Type          | Start | End   | length | Database  | Id                | InterPro ID               | InterPro name                  |
|---------------------|---------------|-------|-------|--------|-----------|-------------------|---------------------------|--------------------------------|
| Vmethyltransf       | Pfam          | 51    | 429   | 379    | PFAM      | PF01660           | <a href="#">IPR002588</a> | Alphavirus-like_MT_dom         |
| ALPHAVIRUS_MT       | PROSITE_PROFI | 69    | 283   | 215    | PROSITE_P | PS51743           | <a href="#">IPR002588</a> | Alphavirus-like_MT_dom         |
| unknown             | Gene3D        | 1,121 | 1,272 | 152    | GENE3D    | G3DSA:2.60.       | <a href="#">IPR027450</a> | AlkB-like                      |
| Clavamate synthase  | Superfamily   | 1,141 | 1,267 | 127    | SUPERFAM  | SSF51197          |                           | Unintegrated                   |
| FE2OG_OXY           | PROSITE_PROFI | 1,179 | 1,269 | 91     | PROSITE_P | PS51471           | <a href="#">IPR005123</a> | Oxoglu/Fe-dep_dioxygenase      |
| PSRV_HELICASE       | PROSITE_PROFI | 2,022 | 2,346 | 325    | PROSITE_P | PS51657           | <a href="#">IPR027351</a> | (+)RNA_virus_helicase_core_dom |
| unknown             | Gene3D        | 2,037 | 2,202 | 166    | GENE3D    | G3DSA:3.40.50.300 |                           | Unintegrated                   |
| P-loop containing n | Superfamily   | 2,041 | 2,299 | 259    | SUPERFAM  | SSF52540          | <a href="#">IPR027417</a> | P-loop_NTPase                  |
| Viral_helicase1     | Pfam          | 2,045 | 2,305 | 261    | PFAM      | PF01443           | <a href="#">IPR027351</a> | (+)RNA_virus_helicase_core_dom |
| RdRP_2              | Pfam          | 2,454 | 2,894 | 441    | PFAM      | PF00978           | <a href="#">IPR001788</a> | Tymovirus_RNA-dep_RNA_pol      |
| DNA/RNA polymer     | Superfamily   | 2,476 | 2,86  | 385    | SUPERFAM  | SSF56672          |                           | Unintegrated                   |
| RDRP_SSRNA_PO       | PROSITE_PROFI | 2,658 | 2,778 | 121    | PROSITE_P | PS50507           | <a href="#">IPR007094</a> | RNA-dir_pol_PSVirus            |

**Supplementary Table 6.** Conserved domains and structural signatures of *Nephila clavipes* virga-like virus 2 (NcVV2) predicted replicase protein and additional gene products assessed by the NCBI-CD database v3.15, THHM v. 2.0, PHOBIUS, SMART, Pfam 31.0, PROSITE Release 2017\_07 and Garnier GOR.

| Annotation          | Type          | Start | End   | length | Database  | Id                | InterPro ID               | InterPro name                  |
|---------------------|---------------|-------|-------|--------|-----------|-------------------|---------------------------|--------------------------------|
| Vmethyltransf       | Pfam          | 50    | 466   | 417    | PFAM      | PF01660           | <a href="#">IPR002588</a> | Alphavirus-like_MT_dom         |
| ALPHAVIRUS_MT       | PROSITE_PROFI | 72    | 281   | 210    | PROSITE_P | PS51743           | <a href="#">IPR002588</a> | Alphavirus-like_MT_dom         |
| PSRV_HELICASE       | PROSITE_PROFI | 801   | 1,116 | 316    | PROSITE_P | PS51657           | <a href="#">IPR027351</a> | (+)RNA_virus_helicase_core_don |
| unknown             | Gene3D        | 808   | 987   | 180    | GENE3D    | G3DSA:3.40.50.300 |                           | Unintegrated                   |
| P-loop containing n | Superfamily   | 823   | 983   | 161    | SUPERFAM  | SSF52540          | <a href="#">IPR027417</a> | P-loop_NTPase                  |
| Viral_helicase1     | Pfam          | 830   | 1,085 | 256    | PFAM      | PF01443           | <a href="#">IPR027351</a> | (+)RNA_virus_helicase_core_don |
| DNA/RNA polymer     | Superfamily   | 1,16  | 1,605 | 446    | SUPERFAM  | SSF56672          |                           | Unintegrated                   |
| RdRP_2              | Pfam          | 1,168 | 1,607 | 440    | PFAM      | PF00978           | <a href="#">IPR001788</a> | Tymovirus_RNA-dep_RNA_pol      |
| RDRP_SSRNA_PO       | PROSITE_PROFI | 1,379 | 1,492 | 114    | PROSITE_P | PS50507           | <a href="#">IPR007094</a> | RNA-dir_pol_Psvirus            |
| TMV-like viral coat | Superfamily   | 2     | 157   | 156    | SUPERFAM  | SSF47195          | <a href="#">IPR001337</a> | TMV-like_coat                  |
| TMV_coat            | Pfam          | 3     | 146   | 144    | PFAM      | PF00721           | <a href="#">IPR001337</a> | TMV-like_coat                  |
| unknown             | Gene3D        | 4     | 155   | 152    | GENE3D    | G3DSA:1.20.       | <a href="#">IPR001337</a> | TMV-like_coat                  |

**Supplementary Table 7.** Conserved domains and structural signatures of *Rehmannia mosaic virus* (*Nephila clavipes* associated strain – RMV (Ncas)) predicted replicase protein and additional gene products assessed by the NCBI-CD database v3.15, THHM v. 2.0, PHOBIUS, SMART, Pfam 31.0, PROSITE Release 2017\_07 and Garnier GOR.



| Annotation          | Type          | Start | End   | length | Database  | Id                | InterPro ID               | InterPro name                  |
|---------------------|---------------|-------|-------|--------|-----------|-------------------|---------------------------|--------------------------------|
| Vmethyltransf       | Pfam          | 63    | 435   | 373    | PFAM      | PF01660           | <a href="#">IPR002588</a> | Alphavirus-like_MT_dom         |
| ALPHAVIRUS_MT       | PROSITE_PROFI | 82    | 289   | 208    | PROSITE_P | PS51743           | <a href="#">IPR002588</a> | Alphavirus-like_MT_dom         |
| unknown             | Gene3D        | 1,024 | 1,28  | 257    | GENE3D    | G3DSA:3.40.50.150 |                           | Unintegrated                   |
| FtsJ                | Pfam          | 1,083 | 1,262 | 180    | PFAM      | PF01728           | <a href="#">IPR002877</a> | rRNA_MeTrfase_FtsJ_dom         |
| S-adenosyl-L-methi  | Superfamily   | 1,084 | 1,263 | 180    | SUPERFAM  | SSF53335          | <a href="#">IPR029063</a> | SAM-dependent_MTases           |
| PSRV_HELICASE       | PROSITE_PROFI | 1,614 | 1,919 | 306    | PROSITE_P | PS51657           | <a href="#">IPR027351</a> | (+)RNA_virus_helicase_core_don |
| unknown             | Gene3D        | 1,643 | 1,774 | 132    | GENE3D    | G3DSA:3.40.50.300 |                           | Unintegrated                   |
| P-loop containing n | Superfamily   | 1,644 | 1,887 | 244    | SUPERFAM  | SSF52540          | <a href="#">IPR027417</a> | P-loop_NTPase                  |
| Viral_helicase1     | Pfam          | 1,644 | 1,888 | 245    | PFAM      | PF01443           | <a href="#">IPR027351</a> | (+)RNA_virus_helicase_core_don |
| RdRP_2              | Pfam          | 2,023 | 2,46  | 438    | PFAM      | PF00978           | <a href="#">IPR001788</a> | Tymovirus_RNA-dep_RNA_pol      |
| DNA/RNA polymer     | Superfamily   | 2,055 | 2,433 | 379    | SUPERFAM  | SSF56672          |                           | Unintegrated                   |
| RDRP_SSRNA_PO       | PROSITE_PROFI | 2,236 | 2,348 | 113    | PROSITE_P | PS50507           | <a href="#">IPR007094</a> | RNA-dir_pol_PSVirus            |
| unknown             | Gene3D        | 40    | 196   | 157    | GENE3D    | G3DSA:1.20.       | <a href="#">IPR001337</a> | TMV-like_coat                  |
| TMV-like viral coat | Superfamily   | 44    | 196   | 153    | SUPERFAM  | SSF47195          | <a href="#">IPR001337</a> | TMV-like_coat                  |
| TMV_coat            | Pfam          | 51    | 188   | 138    | PFAM      | PF00721           | <a href="#">IPR001337</a> | TMV-like_coat                  |

**Supplementary Table 8.** Conserved domains and structural signatures of Hubei virga-like virus 11 (*Nephila clavipes* strain – HvlV11 (Ncs)) predicted replicase protein and additional gene products assessed by the NCBI-CD database v3.15, THHM v. 2.0, PHOBIUS, SMART, Pfam 31.0, PROSITE Release 2017\_07 and Garnier GOR.

## Supplementary Material Debat

| Annotation    | Type          | Start | End   | length | Database  | Id           | InterPro ID               | InterPro name       |
|---------------|---------------|-------|-------|--------|-----------|--------------|---------------------------|---------------------|
| Bunya_RdRp    | Pfam          | 897   | 1,41  | 514    | PFAM      | PF04196      | <a href="#">IPR007322</a> | RNA_pol_bunyavir    |
| RDRP_SSRNA_NE | PROSITE_PROFI | 1,099 | 1,292 | 194    | PROSITE_P | PS50525      | <a href="#">IPR007099</a> | RNA-dir_pol_NSvirus |
| SignalP-noTM  | SIGNALP_EUK   | 1     | 17    | 17     | SIGNALP_E | SignalP-noTM |                           | Unintegrated        |
| Nairovirus_M  | Pfam          | 269   | 420   | 152    | PFAM      | PF07948      | <a href="#">IPR012487</a> | Nairovirus_M        |
| unknown       | TMHMM         | 318   | 340   | 23     | TMHMM     | TMhelix      |                           | Unintegrated        |
| unknown       | TMHMM         | 440   | 459   | 20     | TMHMM     | TMhelix      |                           | Unintegrated        |
| unknown       | TMHMM         | 1,372 | 1,394 | 23     | TMHMM     | TMhelix      |                           | Unintegrated        |

**Supplementary Table 9.** Conserved domains and structural signatures of *Nephila clavipes* bunya-like virus (NcBV) predicted replicase protein and G protein assessed by the NCBI-CD database v3.15, THHM v. 2.0, PHOBIUS, SMART, Pfam 31.0, PROSITE Release 2017\_07 and Garnier GOR.

| Annotation                              | Type          | Start | End   | length | Database   | Id                | InterPro ID | InterPro name      |
|-----------------------------------------|---------------|-------|-------|--------|------------|-------------------|-------------|--------------------|
| DNA/RNA polymer                         | Superfamily   | 187   | 513   | 327    | SUPERFAM   | SSF56672          |             | Unintegrated       |
| RdRP_1                                  | Pfam          | 239   | 463   | 225    | PFAM       | PF00680           | IPR001205   | RNA-dir_pol_C      |
| RDRP_SSRNA_PO                           | PROSITE_PROFI | 301   | 424   | 124    | PROSITE_PI | PS50507           | IPR007094   | RNA-dir_pol_PVirus |
| unknown                                 | Gene3D        | 338   | 447   | 110    | GENE3D     | G3DSA:3.30.70.270 |             | Unintegrated       |
| RNA binding zinc fi                     |               | 986   | 1,089 | 104    |            |                   |             |                    |
| serine peptidase HD                     |               | 349   | 536   | 188    |            |                   |             |                    |
| NUDAURELIA CA domain                    |               | 68    | 619   | 552    |            |                   |             |                    |
| autocatalytic Asn re glycosylation site |               | 599   | 599   | 1      |            |                   |             |                    |

**Supplementary Table 10.** Conserved domains and structural signatures of *Nephila clavipes* astro-like virus (NcAV) predicted fusion protein and putative capsid protein assessed by the NCBI-CD database v3.15, THHM v. 2.0, PHOBIUS, SMART, Pfam 31.0, PROSITE Release 2017\_07 and Garnier GOR.

## Supplementary Material Debat

| Annotation      | Type          | Start | End | length | Database  | Id                | InterPro ID               | InterPro name       |
|-----------------|---------------|-------|-----|--------|-----------|-------------------|---------------------------|---------------------|
| DNA/RNA polymer | Superfamily   | 14    | 427 | 414    | SUPERFAM  | SSF56672          |                           | Unintegrated        |
| RdRP_1          | Pfam          | 152   | 372 | 221    | PFAM      | PF00680           | <a href="#">IPR001205</a> | RNA-dir_pol_C       |
| RDRP_SSRNA_PO   | PROSITE_PROFI | 210   | 339 | 130    | PROSITE_P | PS50507           | <a href="#">IPR007094</a> | RNA-dir_pol_Psvirus |
| unknown         | Gene3D        | 266   | 361 | 96     | GENE3D    | G3DSA:3.30.70.270 |                           | Unintegrated        |

**Supplementary Table 11.** Conserved domains and structural signatures of Wuhan fly virus 6 (*Nephila clavipes* strain – WFV6 (Ncs)) predicted replicase assessed by the NCBI-CD database v3.15, THHM v. 2.0, PHOBIUS, SMART, Pfam 31.0, PROSITE Release 2017\_07 and Garnier GOR.

| Sample id              | Nep-5         | Nep-7         | Nep-8         | Nep-8         | Nep-8         | Nep-8         | Nep-8         | Nep-8         | Nep-8          | Nep-8    |
|------------------------|---------------|---------------|---------------|---------------|---------------|---------------|---------------|---------------|----------------|----------|
| Tissue                 | Whole body #1 | Whole body #2 | Silk gland #1 | Silk gland #2 | Silk gland #3 | Silk gland #4 | Silk gland #5 | Silk gland #6 | Venom gland #1 | Brain #1 |
| NcPV1                  | 25,04         | 29,11         | 38,55         | 48,71         | 100,38        | 122,30        | 30,58         | 122,57        | 84,21          | 130,44   |
| NcPV2                  | 31,14         | 0,61          | 7,80          | 15,26         | 13,08         | 17,53         | 1,94          | 94,24         | 8,78           | 3543,73  |
| NcPV3                  | 8,82          | 0,64          | 0,87          | 1,40          | 1,39          | 2,31          | 0,31          | 11,50         | 0,92           | 964,09   |
| NcPV4                  | 0,39          | 0,00          | 0,44          | 1,37          | 0,99          | 0,97          | 0,15          | 2,64          | 1,29           | 16,04    |
| NcVV1                  | 8,92          | 0,12          | 2,93          | 3,31          | 7,07          | 234,98        | 3,38          | 23,44         | 10,81          | 620,85   |
| NcVV2                  | 0,05          | 8,43          | 0,00          | 0,00          | 0,01          | 0,02          | 0,00          | 0,00          | 0,01           | 0,01     |
| NcBV RNAL              | 0,00          | 0,30          | 0,00          | 0,00          | 0,00          | 0,00          | 0,00          | 0,00          | 0,00           | 0,00     |
| NcBV RNAM              | 0,00          | 0,12          | 0,00          | 0,00          | 0,01          | 0,00          | 0,00          | 0,00          | 0,00           | 0,00     |
| NcRV1 RNA 1            | 3,42          | 0,13          | 1,68          | 2,73          | 2,39          | 7,23          | 1,69          | 17,94         | 10,02          | 322,92   |
| NcRV1 RNA 2            | 6,96          | 0,12          | 1,81          | 3,47          | 3,49          | 7,60          | 2,13          | 20,12         | 10,09          | 367,63   |
| NcRV1 RNA 3            | 4,48          | 0,06          | 1,89          | 3,98          | 3,74          | 8,26          | 1,50          | 18,74         | 10,01          | 259,17   |
| NcRV1 RNA 4            | 2,11          | 0,02          | 0,86          | 1,03          | 1,19          | 1,67          | 0,66          | 5,23          | 4,81           | 91,38    |
| NcRV2 RNA 1            | 0,00          | 0,00          | 0,00          | 0,02          | 0,01          | 0,00          | 0,00          | 0,01          | 0,00           | 0,16     |
| NcRV2 RNA 2            | 0,00          | 0,00          | 0,00          | 0,00          | 0,00          | 0,00          | 0,00          | 0,00          | 0,03           | 0,04     |
| NcRV2 RNA 3            | 0,00          | 0,00          | 0,00          | 0,00          | 0,00          | 0,00          | 0,00          | 0,00          | 0,01           | 0,03     |
| NcRV2 RNA 4            | 0,00          | 0,00          | 0,00          | 0,00          | 0,00          | 0,02          | 0,00          | 0,01          | 0,01           | 0,13     |
| NcRV2 RNA 5            | 0,00          | 0,00          | 0,00          | 0,00          | 0,00          | 0,00          | 0,00          | 0,00          | 0,03           | 0,08     |
| NcRV2 RNA 6            | 0,00          | 0,00          | 0,00          | 0,00          | 0,00          | 0,00          | 0,00          | 0,00          | 0,00           | 0,00     |
| NcRV2 RNA 7            | 0,00          | 0,00          | 0,00          | 0,00          | 0,00          | 0,00          | 0,00          | 0,00          | 0,00           | 0,03     |
| NcRV2 RNA 8            | 0,00          | 0,00          | 0,00          | 0,02          | 0,00          | 0,00          | 0,00          | 0,00          | 0,00           | 0,00     |
| NcRV2 RNA 9            | 0,00          | 0,00          | 0,00          | 0,00          | 0,06          | 0,00          | 0,00          | 0,03          | 0,00           | 0,04     |
| NcRV2 RNA 10           | 0,00          | 0,00          | 0,00          | 0,00          | 0,00          | 0,00          | 0,00          | 0,00          | 0,01           | 0,08     |
| NcAV                   | 0,92          | 0,01          | 0,15          | 0,28          | 0,29          | 0,07          | 0,05          | 1,46          | 0,06           | 40,97    |
| WFV6 (Nc strain) RNA 1 | 0,30          | 0,03          | 0,10          | 0,06          | 0,04          | 0,00          | 0,02          | 0,02          | 0,02           | 0,05     |
| WFV6 (Nc strain) RNA 2 | 0,00          | 0,00          | 0,07          | 0,00          | 0,02          | 0,00          | 0,00          | 0,00          | 0,04           | 0,00     |
| HvIV11 (Nc strain)     | 0,42          | 0,06          | 0,57          | 1,98          | 1,23          | 2,77          | 0,21          | 7,75          | 0,85           | 35,96    |
| RMV (Nc strain)        | 0,00          | 0,00          | 0,00          | 0,00          | 0,00          | 0,00          | 0,00          | 0,00          | 0,00           | 0,00     |

| Sample id              | Nep-9         | Nep-9         | Nep-9         | Nep-9          | Nep-9          | Nep-9    |
|------------------------|---------------|---------------|---------------|----------------|----------------|----------|
| Tissue                 | Silk gland #7 | Silk gland #8 | Silk gland #9 | Silk gland #10 | Venom gland #2 | Brain #2 |
| NcPV1                  | 445,89        | 100,90        | 47,77         | 51,33          | 52,81          | 18,40    |
| NcPV2                  | 0,14          | 0,09          | 0,05          | 0,09           | 41,52          | 0,20     |
| NcPV3                  | 0,03          | 0,05          | 0,02          | 0,02           | 1,73           | 0,04     |
| NcPV4                  | 0,00          | 0,00          | 0,00          | 0,00           | 3,76           | 0,00     |
| NcVV1                  | 0,03          | 0,02          | 0,04          | 0,03           | 5,19           | 0,08     |
| NcVV2                  | 12,08         | 14,57         | 11,75         | 3,97           | 0,89           | 47,31    |
| NcBV RNAL              | 5,94          | 9,62          | 10,71         | 7,08           | 5,73           | 40,19    |
| NcBV RNAM              | 0,51          | 1,12          | 2,56          | 1,27           | 0,00           | 12,89    |
| NcRV1 RNA 1            | 6,22          | 2,46          | 88,10         | 31,59          | 7,80           | 3070,73  |
| NcRV1 RNA 2            | 17,77         | 9,43          | 214,66        | 30,69          | 24,21          | 2784,66  |
| NcRV1 RNA 3            | 9,91          | 5,03          | 141,07        | 29,28          | 24,54          | 1394,45  |
| NcRV1 RNA 4            | 6,31          | 1,99          | 83,74         | 28,70          | 17,14          | 731,34   |
| NcRV2 RNA 1            | 0,01          | 0,01          | 0,25          | 0,04           | 0,00           | 2,40     |
| NcRV2 RNA 2            | 0,01          | 0,03          | 0,21          | 0,04           | 0,00           | 2,70     |
| NcRV2 RNA 3            | 0,06          | 0,00          | 0,10          | 0,00           | 0,00           | 2,47     |
| NcRV2 RNA 4            | 0,01          | 0,01          | 0,21          | 0,00           | 0,00           | 2,33     |
| NcRV2 RNA 5            | 0,02          | 0,00          | 0,23          | 0,03           | 0,00           | 2,54     |
| NcRV2 RNA 6            | 0,00          | 0,02          | 0,34          | 0,02           | 0,00           | 2,51     |
| NcRV2 RNA 7            | 0,00          | 0,00          | 0,21          | 0,00           | 0,00           | 2,84     |
| NcRV2 RNA 8            | 0,00          | 0,00          | 0,21          | 0,00           | 0,00           | 3,31     |
| NcRV2 RNA 9            | 0,29          | 0,06          | 0,15          | 0,06           | 0,00           | 3,48     |
| NcRV2 RNA 10           | 0,03          | 0,01          | 0,04          | 0,01           | 0,00           | 2,88     |
| NcAV                   | 0,00          | 0,00          | 0,00          | 0,00           | 0,00           | 0,00     |
| WFV6 (Nc strain) RNA 1 | 37,76         | 8,22          | 89,68         | 13,30          | 0,00           | 720,92   |
| WFV6 (Nc strain) RNA 2 | 63,76         | 15,58         | 105,48        | 13,49          | 7,49           | 808,45   |
| HvIV11 (Nc strain)     | 14,15         | 2,57          | 12,61         | 0,16           | 3,04           | 58,80    |
| RMV (Nc strain)        | 0,00          | 2,41          | 0,00          | 0,00           | 0,00           | 0,00     |

**Supplementary Table 12.** FPKM values by sample of RNA-seq reads mapped to *N. clavipes* virus transcripts, assayed in two whole body spider samples, ten individual silk glands, two venom glands, and two brain isolates collected from four non-gravid females, Nep-5, Nep-7, Nep-8 and Nep-009..
